# Supplementary material for: Lernergebnisse und individuelle Prozesse des Physik-Lernens mit auditiven und visuellen Hinweisen
Source: Atypon-hosted journal article supplement (doi:10.1024/1010-0652/a000331), 2021-09-30
Supplement: 1010-0652_a000331_esm1.pdf [file 1010-0652_a000331_esm1.pdf]

## Elektronisches Supplement (ESM) 1

Auf die nachfolgenden Tabellen und Abbildungen wird im Manuskript an entsprechender Stelle verwiesen.

### Tabellen E5-E9

**Tabelle E5.** Multivariate Varianzanalyse der globalen Blickparameter (gesamtes Display) getrennt nach Versuchsbedingung

| Blickparameter                                | Auditiv ( $n = 23$ ) |        | Visuell ( $n = 23$ ) |        | $F(1, 44)$ | $p$  | $\eta_p^2$ |
|-----------------------------------------------|----------------------|--------|----------------------|--------|------------|------|------------|
|                                               | $M$                  | $SD$   | $M$                  | $SD$   |            |      |            |
| Anzahl der Sakkaden <sup>a</sup>              | 1576.48              | 451.84 | 1891.78              | 352.40 | 6.96       | .011 | .14        |
| Anzahl der Fixationen <sup>a</sup>            | 1760.61              | 419.34 | 2074.00              | 363.48 | 7.34       | .010 | .14        |
| Durchschnittliche Fixationsdauer <sup>b</sup> | 0.49                 | 0.13   | 0.42                 | 0.08   | 5.86       | .020 | .12        |

*Anmerkungen.* <sup>a</sup> Summe über alle 8 Aufgaben im Lernmaterial. <sup>b</sup> Angaben in Sekunden.

**Tabelle E6.** Multivariate Varianzanalyse der lokalen Blickparameter (AOI über den vier Schaltskizzen a-d) getrennt nach Versuchsbedingung

| Blickparameter                                | Auditiv ( $n = 23$ ) |        | Visuell ( $n = 23$ ) |        | $F(1, 44)$ | $p$  | $\eta_p^2$ |
|-----------------------------------------------|----------------------|--------|----------------------|--------|------------|------|------------|
|                                               | $M$                  | $SD$   | $M$                  | $SD$   |            |      |            |
| Anzahl der Fixationen <sup>a</sup>            | 1111.48              | 297.50 | 773.44               | 170.30 | 22.37      | .001 | .337       |
| Durchschnittliche Fixationsdauer <sup>b</sup> | 0.55                 | 0.17   | 0.40                 | 0.08   | 14.29      | .001 | .245       |

*Anmerkungen.* Bei den lokalen Blickparametern können keine Sakkaden berichtet werden, da diese teilweise aus den AOIs herauspringen. <sup>a</sup> Summe über alle 8 Aufgaben im Lernmaterial.

<sup>b</sup> Angaben in Sekunden.

**Tabelle E7.** Interkorrelationen zwischen Vorwissen, kognitiver Belastung, Lernerfolg und globalen Blickbewegungsparametern (gesamtes Display) für die auditive (oberhalb der Diagonalen) und visuelle Bedingung (unterhalb der Diagonalen)

| Variable                               | (1)   | (2)   | (3)   | (4)   | (5)    | (6)   | (7)    | (8)    | (9)    |
|----------------------------------------|-------|-------|-------|-------|--------|-------|--------|--------|--------|
| (1) Vorwissen                          | —     | -.16  | .21   | -.45* | .50*   | .30   | .35    | .37    | -.34   |
| (2) inhaltsbedingte Belastung          | -.07  | —     | .63** | .25   | -.22   | -.23  | -.27   | -.20   | -.05   |
| (3) sachfremde Belastung               | .19   | .51*  | —     | -.04  | -.13   | -.23  | -.25   | -.17   | -.11   |
| (4) lernrelevante Belastung            | -.23  | .24   | -.07  | —     | -.58** | -.09  | .13    | .17    | -.17   |
| (5) Wissensabruf                       | .39   | -.47* | -.38  | -.34  | —      | .63** | .05    | .03    | .07    |
| (6) Wissenstransfer                    | .64** | -.26  | -.27  | -.26  | .61**  | —     | .20    | .20    | .01    |
| (7) Anzahl der Sakkaden <sup>a</sup>   | -.22  | .08   | -.26  | .18   | -.17   | -.12  | —      | .98**  | -.66** |
| (8) Anzahl der Fixationen <sup>a</sup> | -.35  | .03   | -.34  | .12   | -.18   | -.19  | .95**  | —      | -.75** |
| (9) Durchschnittliche Fixationsdauer   | .32   | .02   | .15   | -.06  | .23    | .25   | -.71** | -.81** | —      |

Anmerkungen. <sup>a</sup> Basierend auf der Summe über alle 8 Aufgaben. \*  $p < .05$ , \*\*  $p < .01$ .

**Tabelle E8.** Deskriptive Statistik der globalen Blickparameter (gesamtes Display) nach Versuchsbedingung und Vorwissen

| Blickparameter                                | Auditive Bedingung              |           |                              |           | Visuelle Bedingung              |           |                             |           |
|-----------------------------------------------|---------------------------------|-----------|------------------------------|-----------|---------------------------------|-----------|-----------------------------|-----------|
|                                               | Niedriges Vorwissen ( $n = 4$ ) |           | Hohes Vorwissen ( $n = 13$ ) |           | Niedriges Vorwissen ( $n = 5$ ) |           | Hohes Vorwissen ( $n = 9$ ) |           |
|                                               | <i>M</i>                        | <i>SD</i> | <i>M</i>                     | <i>SD</i> | <i>M</i>                        | <i>SD</i> | <i>M</i>                    | <i>SD</i> |
| Anzahl der Sakkaden <sup>a</sup>              | 1423.25                         | 545.46    | 1692.46                      | 469.49    | 1941.80                         | 432.34    | 1830.78                     | 309.54    |
| Anzahl der Fixationen <sup>a</sup>            | 1615.50                         | 458.73    | 1877.69                      | 438.72    | 2203.40                         | 347.51    | 1995.11                     | 316       |
| Durchschnittliche Fixationsdauer <sup>b</sup> | 0.48                            | 0.06      | 0.45                         | 0.10      | 0.38                            | 0.07      | 0.42                        | 0.06      |

*Anmerkungen.* <sup>a</sup> Summe über alle 8 Aufgaben im Lernmaterial. <sup>b</sup> Angaben in Sekunden.

**Tabelle E9.** Deskriptive Statistik der lokalen Blickparameter (AOI über den vier Schaltskizzen a-d) nach Versuchsbedingung und Vorwissen

| Blickparameter                                | Auditive Bedingung              |           |                              |           | Visuelle Bedingung              |           |                             |           |
|-----------------------------------------------|---------------------------------|-----------|------------------------------|-----------|---------------------------------|-----------|-----------------------------|-----------|
|                                               | Niedriges Vorwissen ( $n = 4$ ) |           | Hohes Vorwissen ( $n = 13$ ) |           | Niedriges Vorwissen ( $n = 5$ ) |           | Hohes Vorwissen ( $n = 9$ ) |           |
|                                               | <i>M</i>                        | <i>SD</i> | <i>M</i>                     | <i>SD</i> | <i>M</i>                        | <i>SD</i> | <i>M</i>                    | <i>SD</i> |
| Anzahl der Fixationen <sup>a</sup>            | 945.50                          | 291.05    | 1200.77                      | 320.01    | 818.40                          | 182.26    | 786.78                      | 178.31    |
| Durchschnittliche Fixationsdauer <sup>b</sup> | 0.55                            | 0.11      | 0.50                         | 0.13      | 0.36                            | 0.08      | 0.40                        | 0.06      |

*Anmerkungen.* Bei den lokalen Blickparametern können keine Sakkaden berichtet werden, da diese teilweise aus den AOIs herauspringen.

<sup>a</sup> Summe über alle 8 Aufgaben im Lernmaterial. <sup>b</sup> Angaben in Sekunden.

## Abbildungen E4-E5

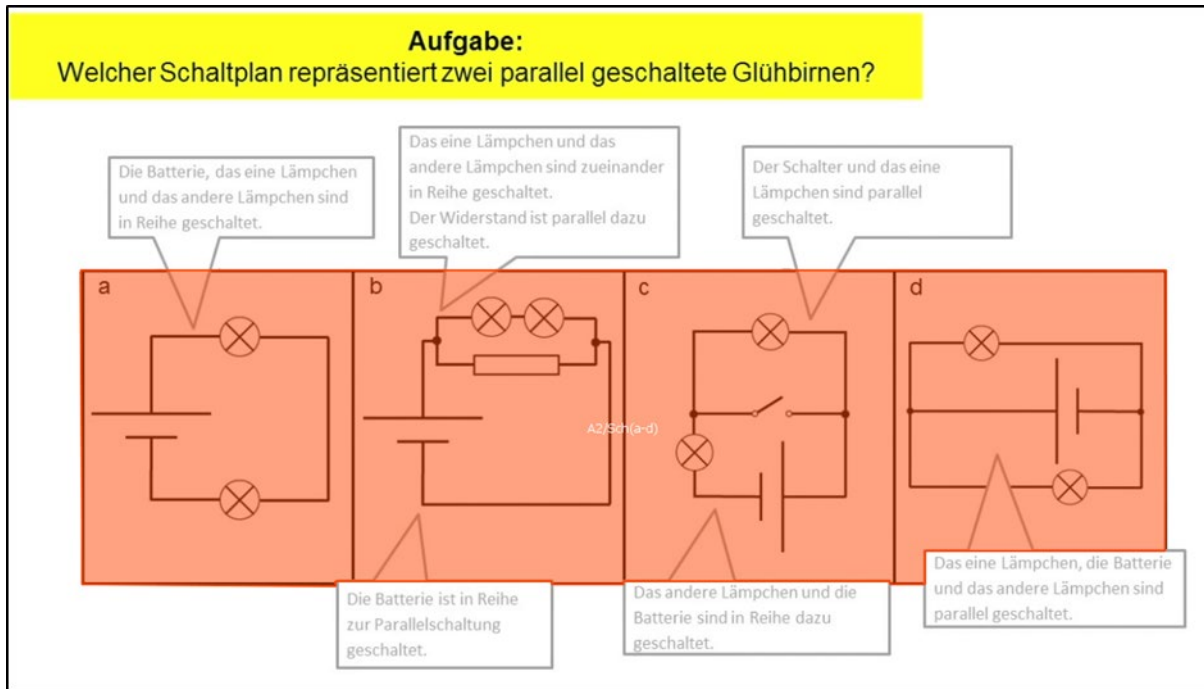

**Abbildung E4.** Darstellung einer Aufgabe aus der visuellen Bedingung mit der gezogenen *area of interest* (orange) über den vier Schaltskizzen a-d.

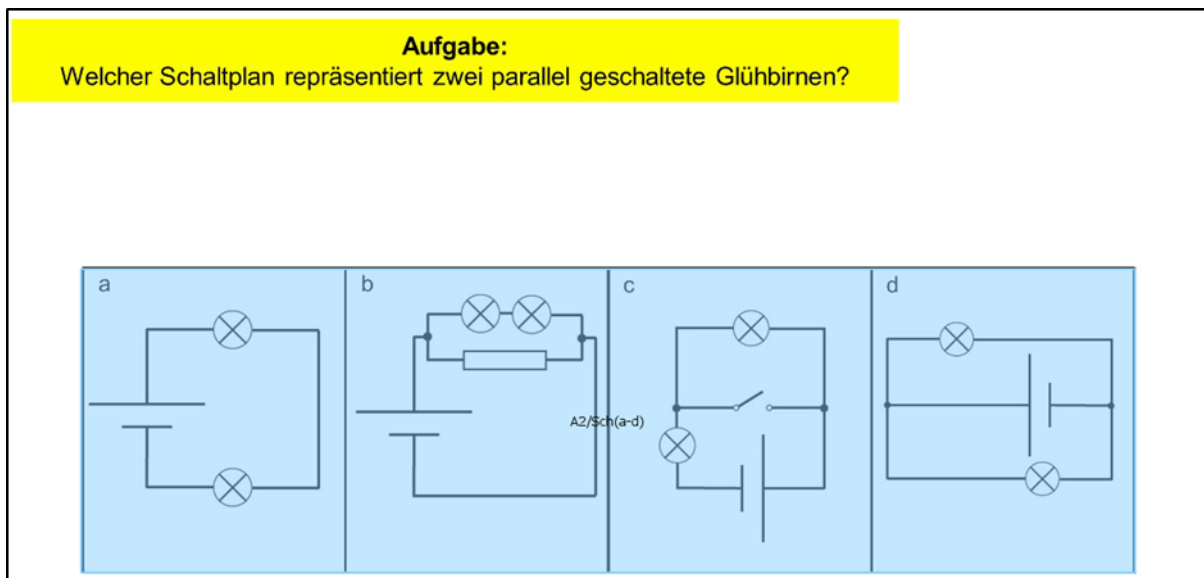

**Abbildung E5.** Darstellung einer Aufgabe aus der auditiven Bedingung mit der gezogenen *area of interest* (blau) über den vier Schaltskizzen a-d.
